## RESEARCH ARTICLE

# Can offsetting the energetic cost of hibernation restore an active season phenotype in grizzly bears (*Ursus arctos horribilis*)?

Heiko T. Jansen<sup>1,\*</sup>, Brandon Evans Hutzenbiler<sup>1</sup>, Hannah R. Hapner<sup>2</sup>, Madeline L. McPhee<sup>1</sup>, Anthony M. Carnahan<sup>2</sup>, Joanna L. Kelley<sup>2</sup>, Michael W. Saxton<sup>2</sup> and Charles T. Robbins<sup>2,3</sup>

## ABSTRACT

Hibernation is characterized by depression of many physiological processes. To determine if this state is reversible in a non-food caching species, we fed hibernating grizzly bears (*Ursus arctos horribilis*) dextrose for 10 days to replace 53% or 100% of the estimated minimum daily energetic cost of hibernation. Feeding caused serum concentrations of glycerol and ketones ( $\beta$ -hydroxybutyrate) to return to active season levels irrespective of the amount of glucose fed. By contrast, free fatty acids (FFAs) and indices of metabolic rate, such as general activity, heart rate, strength of heart rate circadian rhythm, and insulin sensitivity were restored to approximately 50% of active season levels. Body temperature was unaffected by feeding. To determine the contribution of adipose to the metabolic effects observed after glucose feeding, we cultured bear adipocytes collected at the beginning and end of the feeding and performed metabolic flux analysis. We found a ~33% increase in energy metabolism after feeding. Moreover, basal metabolism before feeding was 40% lower in hibernation cells compared with fed cells or active cells cultured at 37°C, thereby confirming the temperature independence of metabolic rate. The partial depression of circulating FFAs with feeding likely explains the incomplete restoration of insulin sensitivity and other metabolic parameters in hibernating bears. Further depression of metabolic function is likely to be an active process. Together, the results provide a highly controlled model to examine the relationship between nutrient availability and metabolism on the hibernation phenotype in bears.

**KEY WORDS:** Bear, Hibernation, Metabolism, Circadian rhythm, Cell culture, Adipocyte

## INTRODUCTION

The ability to hibernate or express torpor (a shorter period of metabolic depression and body temperature reduction) may have evolved multiple times and suggests that different cellular mechanisms can produce this phenotype (Geiser, 1998, 2004). Hibernation in rodents has long captured the attention of physiologists owing to the extreme changes that occur seasonally in metabolism, body temperature and body mass (Carey et al., 2003; Mohr et al., 2020; Nelson et al., 1983; Storey and Storey, 1990). However, hibernating brown bears (*Ursus arctos*) exhibit a very

different phenotype from what occurs during rodent hibernation (Harlow et al., 2002; Hellgren, 1998; Jansen et al., 2016; Lane et al., 2012; Lin et al., 2012; Lohuis et al., 2005; Nelson et al., 1983; Robbins et al., 2012; Toien et al., 2011; Ware et al., 2012). Thus, comparative studies provide an ideal opportunity to explore the different genetic, physiological, biochemical and environmental underpinnings of hibernation.

Climate change and other anthropogenic factors present new challenges for virtually all hibernators and it is important to determine if these factors could alter, or even eliminate, the expression of this ancestral phenotype (Geiser, 1998, 2013; Lane et al., 2012). One extensively studied factor promoting hibernation is the amount and quality of food (Florant and Healy, 2012; Frank et al., 2008; Harlow and Frank, 2001; Siutz et al., 2017; Vuarin and Henry, 2014). Bears and many other seasonal hibernators undergo extreme annual mass gains due to increasing adiposity prior to hibernation (Carey et al., 2003; Dark, 2005). Along with this high level of adiposity preceding the onset of hibernation, hibernating bears reduce their activity levels by more than 90% (Robbins et al., 2012; Ware et al., 2012), develop insulin resistance (Kamine et al., 2012a; McCain et al., 2013; Palumbo et al., 1983; Rigano et al., 2017) and reduce their heart rate by as much as 90% relative to the active state while maintaining a relative high body temperature in comparison to rodents (Laske et al., 2017; Nelson et al., 2010; Toien et al., 2011).

Although the impact of food availability on torpor in heterothermic endotherms has been extensively studied (see review by Vuarin and Henry, 2014), several aspects such as the lack of discrete torpor-arousal bouts, large body mass and birth of young in the den, are unique to bears. Thus, to further explore the genetic and physiological controls of bear hibernation, we sought to develop an experimental paradigm whereby some or all aspects of hibernation could be reversed. To this end we reasoned that by feeding a single nutrient, glucose, rather than a complex diet, we could relate energy supply to energy demand via alterations in metabolic profiles and physiology during hibernation. Similarly, if the cellular changes that are triggered by consuming a single nutrient were preserved in cells from a critical tissue such as adipose, we then would have a robust system of three metabolic states (e.g. hibernation, fed-hibernation and fed-active) to explore many basic aspects of hibernation both *in vivo* and *in vitro*. The present study was therefore performed to test the hypothesis that glucose feeding is capable of reversing the hibernation phenotype in bears.

## MATERIALS AND METHODS

### Animals

Grizzly bears (*Ursus arctos horribilis* Linnaeus 1758,  $n=11$ ) of both sexes and ranging from three to 15 years of age at the time of study were used. Bears were housed at the Washington State University

<sup>1</sup>Dept. Integrative Physiology and Neuroscience, College of Veterinary Medicine, Washington State University, Pullman, WA 99164, USA. <sup>2</sup>School of Biological Sciences, College of Arts and Sciences, Washington State University, Pullman, WA 99164, USA. <sup>3</sup>School of the Environment, College of Agricultural, Human and Natural Resource Sciences, Washington State University, Pullman, WA 99164, USA.

\*Author for correspondence (heiko@wsu.edu)

 H.T.J., 0000-0003-0178-396X

Bear Research, Education and Conservation Center (WSU Bear Center, Pullman, WA, USA) in accordance with the Bear Care and Colony Health Standard Operating Procedures approved by the Washington State Institutional Animal Care and Use Committee based on US Department of Agriculture guidelines and in accordance with current animal care and use guidelines approved by the American Society of Mammalogists (Sikes et al., 2011), protocols #04952, #06546 and #06468. The bears in the facility hibernate from November to mid-to-late March. Diet and feeding schedules during April–October (active season) were similar to those described previously (Rigano et al., 2017). Bears were monitored continuously using video cameras mounted in each den, outdoor run and outdoor exercise yard.

### Feeding during hibernation

Bears at the WSU Bear Center are trained for blood sampling year-round using honey diluted 12.5–25% with water (v:v) (Joyce-Zuniga et al., 2016; Ware et al., 2013). Bears are highly motivated to receive honey during blood sampling based on positive-reinforcement training and can be sampled without the use of sedatives or other drugs even during hibernation (Joyce-Zuniga et al., 2016). Thus, feeding glucose (dextrose, Sigma-Aldrich, St Louis, MO) during hibernation is a simple extension of this approach. The amount of dextrose fed was calculated to replace the estimated daily energy lost based on the least observed metabolic rate (LOMR) of hibernating grizzly bears using:

$$Y = 4.8X^{1.09}, \quad (1)$$

where  $Y$  is least observed metabolic rate ( $\text{kcal day}^{-1}$ ) and  $X$  is body mass (kg) (Robbins et al., 2012).

We chose two levels of energy replacement based on the LOMR: 53% ( $n=7$ ) and 100% ( $n=6$ ). The 53% level was fed in January (mid-hibernation) 2017–2018 and corresponds to  $1 \text{ g kg}^{-1} \text{ day}^{-1}$  glucose which is the standard dose used for our oral glucose tolerance tests oGTT (see below) and used to confirm the insulin resistance of hibernating bears (Rigano et al., 2017). The 100% level (range  $1.82\text{--}1.93 \text{ g kg}^{-1}$  depending on bear mass) was fed in January 2018–2019. Four bears served as unfed controls. For both feeding trials, dextrose was diluted in water to the same concentration, warmed to approximately  $22^\circ\text{C}$  and fed once daily at 09:00 h for 10 consecutive days. The volume of dextrose fed daily was based on the mass measured at the start of hibernation minus the predicted mass loss that occurred since the beginning of hibernation (Robbins et al., 2012). The 10 day feeding duration was chosen to allow for comparisons of glucose disposal (see below) and for sufficient recovery of energetic and metabolic parameters without obscuring hibernation altogether. The timeline for feeding and related procedures is shown in Fig. S1.

### Tissue and blood sampling

Fat biopsies were obtained using a 6 mm biopsy punch after bears were anesthetized with a combination of tiletamine HCl/zolazepam HCl (Telazol®; Zoetis, Florham Park, NJ) and dexmedetomidine (Zoetis) as described previously (Rigano et al., 2017). At this time, larger volumes of blood were also collected ( $\sim 150 \text{ ml}$ ) from the jugular vein into 10 ml Tiger-Top tubes (BD Vacutainer SST tubes) for use in cell culture experiments. Blood was allowed to clot, centrifuged within 3–4 h and then aliquoted to separate serum. Serum was stored frozen at  $-80^\circ\text{C}$  until assayed or used for cell culture (see below). Serum was collected from bears in hibernation (pre-feeding; HIBS), fed bears (DEXS) and active season bears

(ACTS). Blood was also collected using a 1 ml syringe for intermittent glucose determinations (in duplicate) from the trained unanesthetized bears (fed group only) using a calibrated Accu-Chek Aviva glucometer (Roche, Basel, Switzerland) while briefly housed in a movable crate described previously (Joyce-Zuniga et al., 2016; Rigano et al., 2017).

### Oral glucose tolerance tests (oGTT)

Prior to dextrose feeding and during the 10 day feeding period we used a modified oGTT protocol to infer the relative state of insulin sensitivity as follows (Fig. S1): on day 0 (pre-feeding, hibernation) a baseline blood sample was collected and then each bear was immediately fed  $1 \text{ g kg}^{-1}$  dextrose. Then, at 120 min, a second blood sample was collected to confirm the relative elevation of blood glucose compared with active season samples. Over the next 10 days bears were fed dextrose as described above. On days 3, 6 and 9 of feeding a single blood sample was obtained at 120 min (Fig. S1) to track the relative changes in insulin sensitivity. Only a single blood sample was collected to avoid adding excess glucose to the study and the need for anesthesia, which can influence glucose disposal and other physiological parameters (Kamine et al., 2012b; Nelson and Robbins, 2010). Then, on day 10, bears in the fed group were administered  $1 \text{ g kg}^{-1}$  dextrose and sampled at 0, 15, 30, 60, 90 and 120 min as previously described (Rigano et al., 2017). Since our bears are trained with honey for blood sampling without the use of anesthesia and honey feeding would confound the blood glucose determinations following dextrose administration, we used a non-caloric substitute (Stevia extract, 8 ml diluted in 500 ml water) to collect the second and subsequent (15, 30, 60, 120 min) blood samples collected during the oGTT. The amount of Stevia extract was kept to a minimum to minimize volume effects. Blood glucose concentrations were determined using a glucometer as described above.

### Serum metabolites, insulin and glucagon

Serum collected at the time of biopsy (before feeding began, mid hibernation and at the completion of the 10 day feeding period) was assayed for glycerol, free fatty acids (FFAs) and ketones ( $\beta$ -hydroxybutyrate) using commercial kits (Cayman Chemical, Ann Arbor, MI) according to the manufacturer's instructions. All samples were assayed in duplicate and corrected for assay blanks where appropriate. Serum insulin and glucagon were determined using a commercial porcine/canine ELISA (Alpco, Salem, NH) and multi-species enzyme immunoassay (Phoenix, Burlingame, CA), respectively, as described previously (Rigano et al., 2017).

### Heart rate and core body temperature

As seasonal changes in heart rate closely follow those of metabolic rate in bears, heart rate can serve as a useful proxy (Nelson and Robbins, 2010; Toien et al., 2011). We used 5 bears (4 fed and 1 unfed) and implanted them with small cardiac monitors developed for human heart patients (Reveal LINQ, Medtronic, Minneapolis, MN;  $4.0 \times 7.2 \times 44.8 \text{ mm}$ ; 2.4 g) which were capable of recording heart rate at 2 min intervals and body temperature at 4 h intervals continuously for up to 2 years. For implantation, bears were anesthetized as described above with a combination of Telazol and dexmedetomidine and surgically prepared using standard procedures. Devices were implanted subcutaneously in left peristernal locations with surgical sutures used to close the puncture sites. All bears were monitored closely for signs of irritation and/or rejection. Data from December 2017 to late February 2018 (53% feeding) and from November 2018 to March

2019 (100% feeding) were analyzed for this study as described below.

### Heart rate and body temperature analysis

Heart rate data were analyzed to determine the effect of feeding on overall metabolic status by comparing mean values for the 10 days prior to feeding (and before biopsy), the 10 days of feeding and for the 10 days after feeding ended (also after biopsy and 5 days of recovery). Additionally, to examine the impact of feeding on daily (circadian) heart rate rhythms, we quantified the strength of the daily heart rate rhythm (%) and its period (h) using custom MATLAB scripts described previously (Jansen et al., 2016). Circadian rhythm strength is defined as the proportion of variance (range 0–100) in the 12–64 h period frequency band and was determined from the discrete wavelet transforms (Jansen et al., 2016). Body temperature data were not analyzed for rhythm strength or period given the long (4 h) sampling interval. Only 10 day mean body temperature data were analyzed for feeding effects.

### Activity determination

General movements (hereafter referred to as ‘activity’) were scored manually daily during the 10 days prior to feeding, during the 10 day feeding period and then for 50 days after glucose feeding using video recordings of each den. Four, 1 h blocks (07:00–08:00 h, 11:00–12:00 h, 15:00–16:00 h and 23:00–00:00 h) were analyzed each day. Each hourly block was then divided into six 10 min epochs. For each epoch, an observer recorded an ‘activity’ bout if a bear stood on all four legs, walked, sat up or reared on its hind legs. Then, the proportion of the 1 h block each bear spent active was calculated. The average percent time spent standing for each hourly epoch for all fed and unfed bears was then calculated and analyzed over the course of the study to allow for statistical analysis of daily and long-term trends.

### Adipocyte cell culture

Mesenchymal stem cells from grizzly bears (Gehring et al., 2016) were obtained from subcutaneous gluteal fat using 6 mm punch biopsies during late May (active season; ACT), early January (pre-fed; HIB) and late January (post-fed, dextrose; DEX). Samples were enzymatically dissociated using Liberase-TM (Sigma-Aldrich) to obtain the stromal vascular fraction (SVF), plated in 12-well culture plates, expanded and cryopreserved as described by Gehring et al. (2016). For oxygen consumption and glucose uptake experiments, cryopreserved cells were thawed, seeded for culture (2500–7000 cells per well) in Seahorse XFp Miniplates (Agilent, Santa Clara, CA, see below) or 96-well culture plates and then differentiated into mature adipocytes according to minor modifications of our previously published protocols (Gehring et al., 2016; Rigano et al., 2017). Briefly, SVF cells were grown in 89% low glucose (5.55 mmol l<sup>-1</sup>) DMEM (ThermoFisher, Waltham, MA) containing glutamax, 10% fetal bovine serum (FBS; Atlanta Biological now Bio-Techne, Minneapolis, MN) and 1% PSA antibiotic/antimycotic (100 units ml<sup>-1</sup> penicillin, 100 µg ml<sup>-1</sup> streptomycin and 0.25 µg ml<sup>-1</sup> amphotericin B) until approximately 80–90% confluent – usually 2–3 days. Differentiation into mature adipocytes was induced with medium containing DMEM, 1% PSA, 10% serum [either bear active (ACTS), hibernation (HIBS) or post fed hibernation (DEXS) serum pooled from individual bears 1:1] or FBS, 861 nmol l<sup>-1</sup> insulin, 1 nmol l<sup>-1</sup> triiodothyronine (T3), 0.5 mmol l<sup>-1</sup> IBMX, 1.1 µmol l<sup>-1</sup> dexamethasone, 0.5 µmol l<sup>-1</sup> rosiglitazone and 125 µmol l<sup>-1</sup> indomethacin for 2 days, producing changes associated with adipogenesis (Gehring et al., 2016).

Differentiation medium was then removed and replaced with a maintenance medium containing low glucose (5.5 mmol l<sup>-1</sup>) DMEM, 1% PSA, 10% bear serum or FBS, 861 nmol l<sup>-1</sup> insulin, 1 nmol l<sup>-1</sup> T3 and 0.5 µmol l<sup>-1</sup> rosiglitazone for 2 days, followed by the same medium composition with 1.0 µmol l<sup>-1</sup> rosiglitazone for an additional 4 days. Cells were assayed 8 days post-induction of differentiation.

### Cellular glucose uptake

We quantified glucose uptake by measuring the difference in medium glucose concentrations before and after insulin stimulation using a standard glucometer. The same protocol was followed to grow cells in 96-well culture plates, as described above. In these experiments, low glucose DMEM containing 1% PSA and ±insulin (1000 nmol l<sup>-1</sup>) was applied for 12 h to cells grown for 8 days post induction of differentiation in different serum conditions described above. Prior to the insulin application, cells were washed 1× with PBS and cultured in low glucose DMEM with 1% PSA without serum overnight.

### Oxygen consumption and glycolysis determinations

Cryopreserved cells from hibernating, fed and active season bears were thawed and plated in 8-well Seahorse XFp Miniplates (Agilent) and processed as described above. Phenotype tests were carried out as described by the manufacturer’s instructions, with minor modifications to optimize our protocol. On the day of metabolic measurements, the cell culture medium was removed, the cells were washed twice and replaced with assay medium [Seahorse Base Medium (103193-100) containing 5.5 mmol l<sup>-1</sup> glucose, 4 mmol l<sup>-1</sup> glutamine and 2 mmol l<sup>-1</sup> pyruvate, pH 7.4]. Plates and assay medium were then placed into a 37°C incubator without CO<sub>2</sub> for 60 min to allow for pH stabilization and outgassing (Pike Winer and Wu, 2014). During this time, the sensor cartridges were loaded with a combination of 2 µmol l<sup>-1</sup> oligomycin and 1 µmol l<sup>-1</sup> FCCP to assess the cellular phenotype and placed in the Seahorse XFp analyzer (Agilent) to be equilibrated/calibrated prior to the assay run. Then, just before loading the miniplates, one final medium change was performed using outgassed medium (starting pH=7.4). At the completion of the preparatory steps, the XFp cell Miniplate was loaded into the XFp analyzer for the determination of: (1) mitochondrial respiration based on oxygen consumption rates (OCR) and (2) glycolytic flux based on extracellular acidification rates (ECAR) (Pike Winer and Wu, 2014). Basal ECAR (mpH min<sup>-1</sup>) and OCR (pmol min<sup>-1</sup>) were determined in six cycles comprising 2 min mix and 2 min measure for a total duration of 24 min. After the sixth basal read, a mixture containing 2 µmol l<sup>-1</sup> oligomycin and 1 µmol l<sup>-1</sup> FCCP was injected into each well to determine the maximal capacity for oxygen consumption using the same cycle parameters as basal conditions (total assay duration 48 min). All experiments were performed at 37°C as the operating temperature of our XFp analyzer was not adjustable. Total protein was determined for each well at the completion of each experiment using a Pierce BCA assay; all rates are reported per min/per µg protein. Values represent the average across seven individual bears, with 2–4 technical replicates per bear per treatment (HIB FBS, *n*=3; HIB ACTS, *n*=2; HIB DEXS, *n*=3; HIB HIBS, *n*=4; ACT FBS, *n*=2; ACT ACTS, *n*=4).

### Statistical analysis

All data were analyzed using Prism v.8.0 (Graphpad Software, San Diego, CA). Mixed effects models were used to compare oGTT blood glucose and insulin results due to missing values. Bear was

used as a random effect and Geisser–Greenhouse correction was applied in all mixed effects models. Cellular glucose uptake was analyzed using two-way ANOVA. Serum metabolite data were analyzed using one-way ANOVA. Activity data were analyzed using mixed effects models to assess time of day, trial phase effects (days post-feeding) and interactive effects. Two-way ANOVA was used to assess effect of feeding, time of day feeding and interactions. OCAR and ECAR results were analyzed using one-way ANOVA of normalized data. *Post hoc* analyses were performed (where appropriate) using Holm–Šidák multiple comparison analysis.

## RESULTS

### Glucose utilization

#### oGTT

The characteristic elevation of blood glucose at 120 min following an oral glucose challenge ( $1 \text{ g kg}^{-1}$ ) and indicative of insulin resistance previously reported (Rigano et al., 2017) was confirmed in the present study for both years (53%:  $t_{1,6}=10.01$ ,  $P=0.0006$ ; 100%:  $t_{1,5}=6.674$ ,  $P=0.0113$ ) (Fig. 1). Over the next 10 days, the elevated 120 min blood glucose concentrations were gradually reduced to an intermediate level (main effect of day:  $F_{2,228,13,37}=24.45$ ,  $P<0.0001$ ). The decline was less pronounced in the 100% feeding group compared with the 53% feeding group (2018) (main effect of year:  $F_{1,6}=13.35$ ,  $P=0.0107$ ). However, by day 9, the 120 min blood glucose concentrations were similar between 53% and 100% fed groups and reached an intermediate concentration relative to the pre-feeding and 120 min values (i.e. not significantly different from day 0, 0 min or day 0, 120 min). oGTT performed at the conclusion of the 10 day feeding period confirmed the increase in glucose disposal. However, there were no significant differences between feeding levels (Fig. 2A; main effect of dextrose feeding level:  $F_{1,40}=0.05837$ ,  $P=0.8103$ ). However, a significant main effect of feeding level was observed when comparing hibernation fed bears to active season fed bears ( $F_{2,21}=11.95$ ,  $P=0.0003$ ) as was a difference in the time course of glucose response (significant time $\times$ feeding level interaction:  $F_{8,49}=5.58$ ,  $P<0.0001$ ). Blood glucose concentrations at 120 min in dextrose-fed bears were not different from active season values but were significantly lower than pre-feeding hibernation levels in 2019 ( $t_{18}=3.385$ ,  $P=0.0196$ ; Fig. 2A).

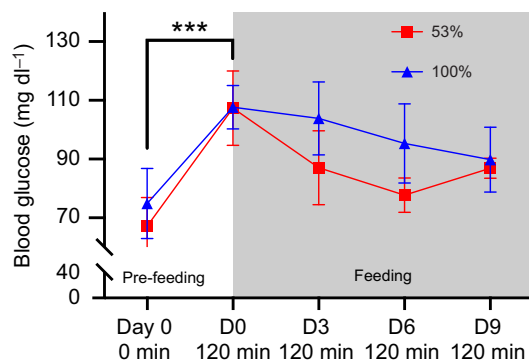

**Fig. 1. Blood glucose concentrations in hibernating grizzly bears (*Ursus arctos horribilis*) before and after feeding glucose.** Samples were collected from bears before feeding glucose (day 0) and on days 0, 3, 6 and 9 at 120 min after feeding dextrose to meet 53% or 100% of predicted hibernation costs. Mixed effects model,  $n=7$  (53%),  $n=6$  (100%); effect of feeding level,  $P=0.0107$ . Holm–Šidák multiple comparison test,  $***P\leq 0.001$ . Values are means $\pm$ s.d.

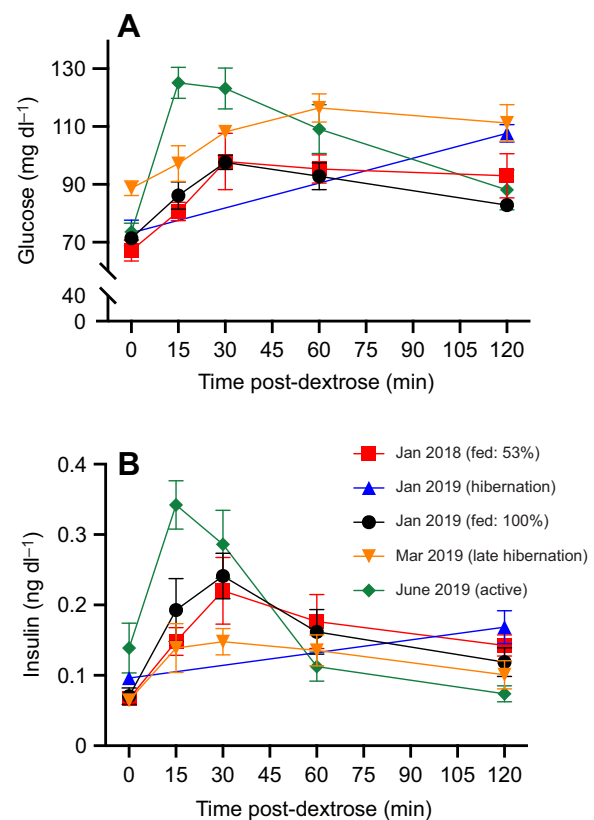

**Fig. 2. Blood glucose and insulin concentrations in grizzly bears prior to (0 min) and during an oral glucose tolerance test.** Mean $\pm$ s.e.m. blood glucose (A) and insulin (B) concentrations before and during an oral glucose tolerance test (oGTT;  $1 \text{ g kg}^{-1}$  dextrose). Active and hibernation seasons are shown for comparison. Orange symbols and lines show oGTT results from March for comparison to January, January fed (100%) and active season. The pre-feeding hibernation glucose data shown in blue in A and B are the same as shown in Fig. 1. Mixed effects model,  $n=6-7$  with each sample assayed in duplicate. See Results for details.

Serum insulin exhibited similar trends to blood glucose prior to feeding (Fig. 2B, blue line). After 10 days of feeding insulin concentrations rose significantly ( $F_{2,319, 35,95}=12.10$ ,  $P<0.0001$ ) but we found no significant differences between 53% and 100% groups (mixed effects analysis;  $F_{1,8}=0.1499$ ,  $P=0.7087$ ). Insulin profiles of the fed bears did differ significantly from those of active season fed bears (time $\times$ feeding level interaction:  $F_{8,62}=3.056$ ,  $P=0.0058$ ).

#### Cellular glucose uptake

An overall effect of insulin ( $F_{1,48}=22.39$ ,  $P<0.0001$ ), serum ( $F_{3,48}=11.09$ ,  $P<0.0001$  and interaction was revealed ( $F_{3,48}=5.019$ ,  $P=0.0042$ ) in hibernation adipocytes (Fig. 3, HIB cells). However, *post hoc* analysis revealed that the enhanced insulin response was due solely to cells cultured in active season serum (ACTS;  $t_{48}=5.658$ ,  $P<0.0001$ ). Cells from fed bears (Fig. 3, DEXS cells) also exhibited an overall effect of insulin-stimulated glucose uptake ( $F_{1,48}=72.27$ ,  $P<0.0001$ ), serum ( $F_{3,48}=6.115$ ,  $P=0.0013$ ) and interaction ( $F_{3,48}=3.077$ ,  $P=0.0362$ ). In contrast to hibernation cells, cells from fed bears responded to insulin under all serum conditions. The effect (fold-change from baseline) was greatest in cells incubated in serum from fed bears (DEXS; approximately 6.5-fold); this response was greater than in fed cells cultured in ACTS (approximately 4-fold) or hibernation cells cultured in ACTS (approximately 3-fold).

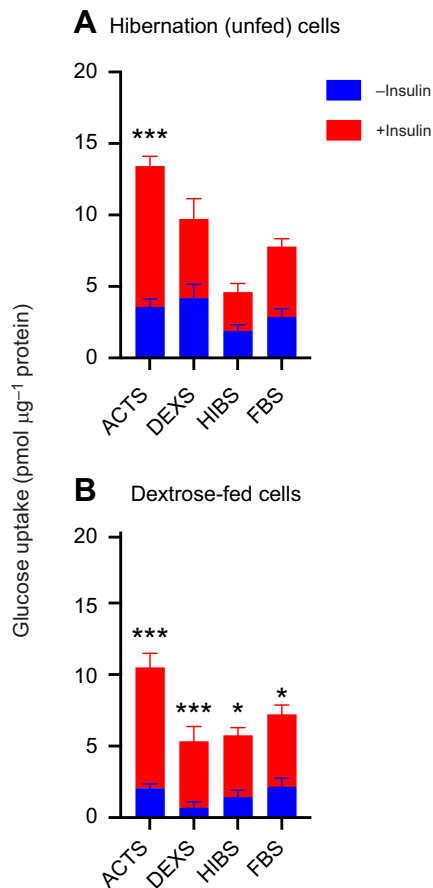

**Fig. 3. Twelve-hour glucose uptake by adipocytes from bears in hibernation.** Twelve-hour glucose uptake (mean±s.e.m.) by bear adipocytes in hibernation (unfed) cells (A) and cells from dextrose-fed (53%) bears (B) treated with or without insulin (1000 nmol l<sup>-1</sup>) and under different serum conditions (ACTS, active season serum; DEXS, dextrose-fed serum; HIBS, hibernation serum; FBS, fetal bovine serum). Two-way ANOVA, \**P*<0.05, \*\*\**P*<0.001. *n*=7 for all serum treatments, duplicate wells used for each serum treatment.

### Serum indices of metabolic status

Daily glucose feeding for 10 days resulted in significant decreases in serum glycerol, FFA and β-hydroxybutyrate concentrations compared with pre-feeding levels (Table 1). However, these reductions did not differ with level of glucose feeding (glycerol:  $F_{1,10}=0.5605$ ,  $P=0.2400$ ; FFA:  $F_{1,10}=0.9270$ ,  $P=0.3583$ ; β-hydroxybutyrate:  $F_{1,10}=0.3786$ ,  $P=0.5521$ ). Pre-feeding levels were similar to those in unfed bears while post-feeding levels were similar to those in the active season (Table 1). Glucagon concentrations were unaffected by feeding (not shown).

**Table 1. Impact of glucose feeding on serum concentrations (means±s.e.m.) of lipolysis products and the ketone, β-hydroxybutyrate, in hibernating bears (*n*=6)<sup>‡</sup>**

|              | Glycerol (µmol l <sup>-1</sup> ) |                          | FFAs (µmol l <sup>-1</sup> ) |                           | β-Hydroxybutyrate (µmol l <sup>-1</sup> ) |                           |
|--------------|----------------------------------|--------------------------|------------------------------|---------------------------|-------------------------------------------|---------------------------|
|              | 53%                              | 100%                     | 53%                          | 100%                      | 53%                                       | 100%                      |
| Pre-feeding  | 122.38±15.81                     | 155.49±20.31             | 376.47±22.92                 | 446.93±43.87              | 507.83±10.82                              | 510.67±19.07              |
| Post-feeding | 65.69±10.21 <sup>b</sup>         | 57.65±13.25 <sup>b</sup> | 167.2±5.48 <sup>a</sup>      | 178.86±25.93 <sup>a</sup> | 183.67±15.96 <sup>b</sup>                 | 162.71±28.71 <sup>b</sup> |
| Unfed        | 109.24±19.65                     |                          | 346.81±80.26                 |                           | 437.13±51.4                               |                           |
| Active       | 48.86±15.09                      |                          | 82.02±24.01 <sup>*</sup>     |                           | 131±10.6                                  |                           |

Bears were fed glucose to replace 53% or 100% of the predicted cost of hibernation (see Materials and Methods for details). Data from unfed hibernating bears (*n*=4; 2019) and fed active season bears (*n*=11) are shown for comparison.

<sup>a</sup>*P*<0.001 versus pre-feeding; <sup>b</sup>*P*<0.05 versus pre-feeding; \**P*<0.01 versus post-feeding; <sup>‡</sup>One bear was removed from the study in 2019 (100% group).

### General activity

Very low levels of activity were observed in all hibernating bears prior to the beginning of feeding (Fig. 4). A blunted, yet clearly evident daily rhythm of activity was present in fed and unfed bears (Fig. 4C,D). Since hourly pre-feeding data were only available for 15:00 h in the 53% group (2017–2018), direct comparisons between glucose groups were not possible. Nevertheless, activity levels were at their lowest in both groups of bears prior to the beginning of feeding.

Daily glucose feeding resulted in significant increases in activity at 07:00, 12:00 and 15:00 h (Fig. 4). The effect of feeding on activity was evident for up to 50 days post feeding in both 53% and 100% groups. However, at 50 days post-feeding, the increase in activity coincided with the natural increase in activity as seen in the unfed bears prior to the end of hibernation. The increase was still nearly twice that of the unfed bears.

### Heart rate and body temperature

The heart rate of hibernating bears prior to any manipulations ranged from 10 to 13 beats per min (bpm) in fed bears (Fig. 5). Upon feeding, heart rate increased significantly ( $F_{1,12}=5.101$ ;  $P=0.043$ ); however, no significant difference between feeding levels was found ( $F_{1,12}=0.002$ ;  $P=0.962$ ). Heart rate was elevated in both 53% and 100% groups for the duration of monitoring or until hibernation ended (Fig. 6). By contrast, heart rate of the unfed bear remained low until March when it began a progressive increase (Fig. 6B, 100%). A similar increasing trend was observed for all of the fed bears. All bears exhibited an increase in heart rate at the time of biopsy (arrows, Fig. 6), but this returned to almost pre-biopsy levels within about 5 days (i.e. during the recovery period). We observed several transient heart rate excursions in the unfed bear (e.g. on 11 Jan. 2018, Fig. 6, 53%) when other bears were being fed. These transients were likely due to brief disturbance as all bears were housed in the same facility, but in different pens. Heart rate returned to low, hibernation levels in the unfed bear once feeding of the other bears ended (Fig. 6A).

Body temperature remained low in all bears and was not significantly affected by feeding (mean±s.e.m.; 53%: Pre, 32.91±0.40°C; Post, 33.97±0.44°C; 100%: Pre, 33.17±0.38°C; Post, 34.62±0.96°C; two-way ANOVA: Main effect of feeding phase:  $F_{1,12}=4.438$ ;  $P=0.0569$ ). Body temperature also did not differ between levels of glucose feeding ( $F_{1,12}=0.5774$ ,  $P=0.462$ ). No significant interactive effects were found.

The strength of the daily heart rate rhythm was low (mean range 14–18%) before glucose feeding but increased significantly in strength to >40% during feeding (Fig. 7) (two-way ANOVA:  $F_{2,18}=44.29$ ,  $P<0.0001$ ). *Post hoc* analysis revealed that rhythm strength was then reduced in the 10 days following feeding and was significantly lower in the 100% fed group compared with the 53%

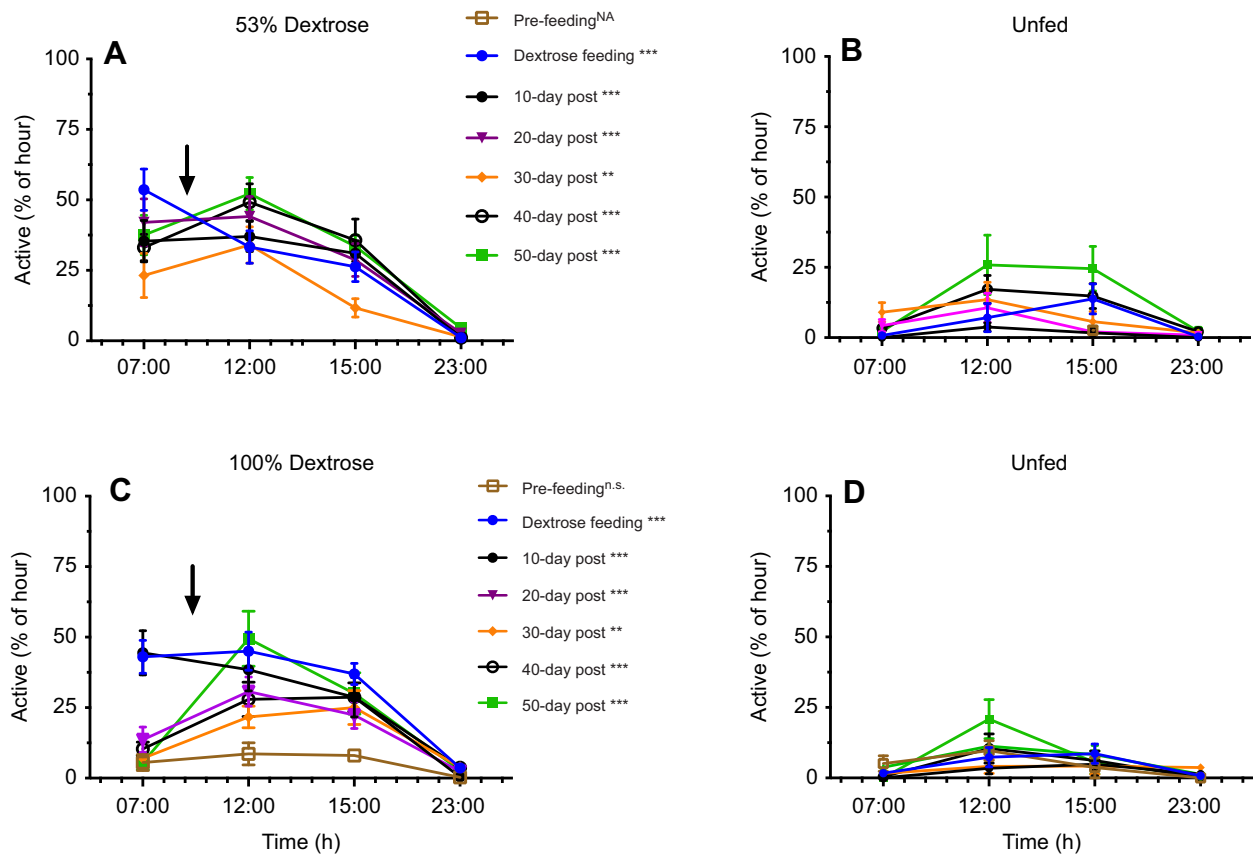

**Fig. 4. Daily activity of fed and unfed bears.** Daily mean ( $\pm$ s.e.m.) activity (% of each hour standing) in 10 day blocks for fed (A,C) and unfed bears (B,D).  $n=7$  for 53% dextrose feeding group;  $n=6$  for 100% dextrose feeding group. Arrows indicate time of feeding (09:00 h) during the 10 day dextrose feeding phase. Two-way ANOVA, main effect of feeding; \*\* $P<0.01$  versus unfed ( $n=4$ ); \*\*\* $P<0.001$  versus unfed ( $n=4$ ). Legend applies to all groups. NA, single time point prevented analysis; n.s., not statistically significant.

group ( $t_{18}=3.090$ ,  $P=0.0188$ ) (Fig. 7). A significant interaction between experimental phase and feeding level was also observed (two-way ANOVA:  $F_{2,18}=6.985$ ,  $P=0.0057$ ). No effect on rhythm period (peak-to-peak interval) was observed (mean rhythm period=24.0 h).

### Cellular energetics

#### Mitochondrial respiration

Serum source significantly influenced oxygen consumption under baseline (non-stressed) conditions ( $F_{3,16}=15.70$ ,  $P<0.0001$ ) (Fig. 8, Fig. S2). Hibernation cells cultured in matching serum (i.e. hibernation, HIBS) exhibited the lowest oxygen consumption rates ( $0.337 \text{ pmol O}_2 \text{ min}^{-1} \mu\text{g}^{-1} \text{ protein}$ ) and this rate was 41.8% lower than ACTS ( $0.478 \text{ pmol O}_2 \text{ min}^{-1} \mu\text{g}^{-1} \text{ protein}$ ;  $t_{16}=3.152$ ,  $P=0.0184$ ). Culturing the hibernation cells with serum from fed bears (DEXS, 53%) significantly increased oxygen consumption by 33.6% ( $0.451 \text{ pmol O}_2 \text{ min}^{-1} \mu\text{g}^{-1} \text{ protein}$ ;  $t_{16}=2.538$ ,  $P=0.0434$ ). All hibernation cells cultured in bear serum exhibited lower mitochondrial respiration rates compared with cells cultured with FBS ( $P\leq 0.0088$ ). Serum affected oxygen consumption under stressed conditions ( $F_{3,16}=6.503$ ,  $P=0.0044$ ). *Post hoc* analysis revealed that only FBS ( $P\leq 0.0166$ ) contributed to the main effect since none of the bear serum treatments differed significantly from one another.

#### Glycolytic flux

Hibernation cells cultured with matching (HIBS) serum exhibited the lowest glycolytic flux (Fig. 8, Fig. S2;  $0.104 \text{ mpH min}^{-1} \mu\text{g}^{-1}$

protein). Under baseline conditions, serum significantly affected medium acidification of hibernation cells ( $F_{3,16}=8.132$ ,  $P=0.0016$ ). Cells cultured with ACTS exhibited a significantly (33.5%) greater glycolytic flux compared with HIBS ( $t_{16}=3.188$ ,  $P=0.0283$ ). By contrast, neither FBS nor DEXS caused significant changes in glycolytic flux (i.e. rightward shift) compared with HIBS. No significant differences in maximal responses for any cell and serum combination were observed ( $F_{3,16}=2.302$ ,  $P=0.116$ ).

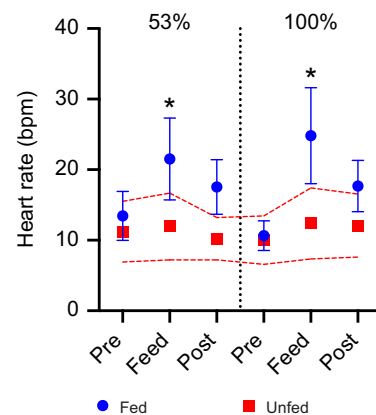

**Fig. 5. Mean heart rates in bears fed two different levels of energy replacement.** The red dashed lines represent the 95% confidence interval for a single unfed bear. Each point represents a 10 day average collected prior to feeding (Pre), during feeding (Feed), and after feeding stopped (Post). Two-way ANOVA (fed groups only); \* $P<0.05$  versus Pre ( $n=4$ ).

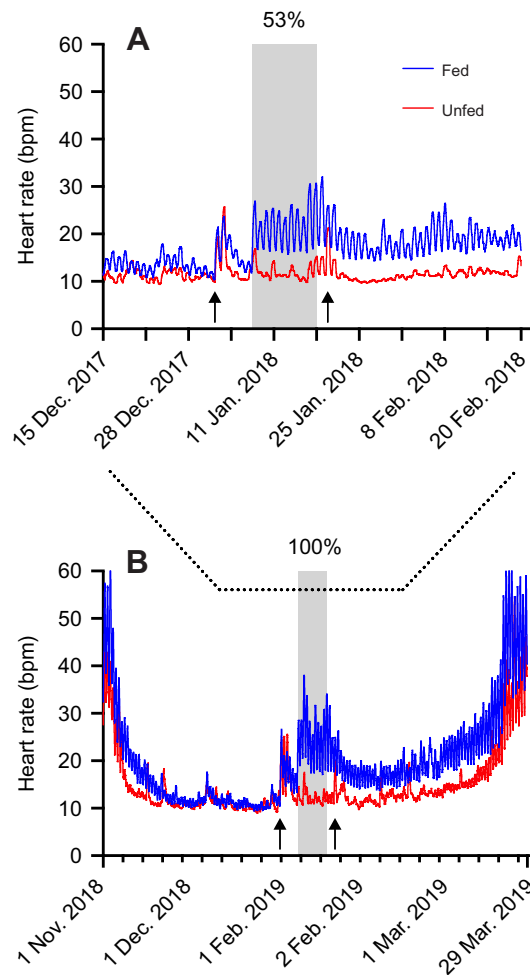

**Fig. 6. Heart rate data for bears fed two levels of energy replacement.** Bears were fed dextrose to meet either (A) 53% or (B) 100% (blue,  $n=4$ ) of predicted cost of hibernation and heart rate data are compared with those for a single unfed bear (red). Heart rate data (2 min) are plotted as 200 point moving averages to visualize long-term trends more easily. The same unfed bear (red) is shown in both panels and in two consecutive years. Dashed line between graphs shows the recording period of the first study in relation to the second. Arrows indicate biopsy dates. Gray bar represents feeding period.

## DISCUSSION

To better understand the processes involved in hibernation, we asked if it was possible to reverse the hibernation state by feeding hibernating bears a single macronutrient, glucose (dextrose). Three physiological systems were interrogated in this study: (1) glucose homeostasis, (2) energetics and metabolism and (3) circadian rhythms. The results demonstrate that the systems studied exhibited partial or complete reversal with dextrose feeding. This approach could be useful in identifying the critical factors necessary to sustain hibernation in bears and perhaps other species.

We found that blood glucose concentrations at 2 h after glucose feeding, irrespective of the amount of dextrose fed, returned to levels intermediate to those of hibernation and active seasons, suggesting that insulin resistance was partially reversed. This partial reversal is similar to findings in fasted diabetic humans (Cahill et al., 1966). We did not find a significant effect of dextrose feeding at the highest level on the insulin:glucose ratio, which has been used as proxy of insulin resistance (Turner et al., 1979) ( $t_9=2.003$ ,  $P=0.0762$ ). This is perhaps not surprising as bears exhibit little

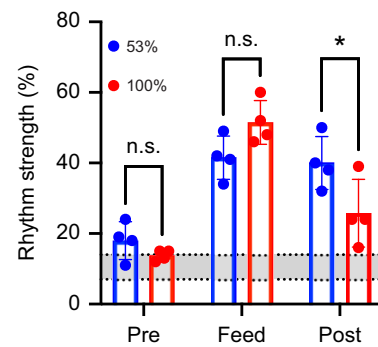

**Fig. 7. Strength of the daily heart rate rhythm before, during and after glucose feeding.** Gray shading represents the range of heart rate rhythm strength for the unfed bear. Two-way ANOVA with Holm–Šidák’s multiple comparison test. \* $P<0.05$ ; mean $\pm$ s.d. of  $n=4$ ; n.s., not significant. See Materials and Methods for details.

evidence of hyperglycemia in hibernation (Rigano et al., 2017; Welinder et al., 2016). A similar lack of significant effect of feeding on insulin:glucose ratios in black bears fed over the winter was observed previously (McCain et al., 2013). Despite the many differences in diet and duration between these two studies, the similar results suggest that factors other than diet are primarily responsible for driving changes in insulin sensitivity. Interestingly, although we found no changes in insulin:glucose ratios in January with feeding, when we performed oGTTs in March (late hibernation) and compared those results with those obtained in June (active season; long-term fed bears) (Fig. 2) we saw large differences in insulin:glucose ratios at baseline (March:  $0.7\times 10^{-3}$ , June:  $1.2\times 10^{-3}$ ). These results are of similar magnitude and direction to those reported in fasted humans (Cahill et al., 1970). Our results therefore reveal a previously unknown feature of insulin resistance in hibernating bears, namely, that it progressively increases throughout hibernation. A similar progressive change has been observed in elephant seal pups over several months of fasting (Olmstead et al., 2017). However, it is also possible that the elevated blood glucose concentrations observed in our bears are the result of reductions in pancreatic beta cell function. The lower basal (time=0) insulin concentrations would be consistent with this hypothesis; however, this remains to be verified.

Elevated circulating FFAs have been strongly associated with obesity and insulin resistance in humans (see review by Boden, 2008). The reductions in circulating FFAs we observed would be consistent with a restoration of insulin sensitivity. However, the depression was not complete and remained at about 50% greater than active levels. By contrast, the reductions in serum concentrations of the ketone  $\beta$ -hydroxybutyrate were essentially complete and are not unlike those observed in marmots stimulated to feed during hibernation (Tokuyama et al., 1991). These results together highlight the inherent flexibility of metabolic systems in hibernators in response to nutrients. Combined with the observed changes in whole body glucose disposal following single nutrient feeding, this should make the identification of cellular and molecular mediators more straightforward.

Certainly, many effects can be attributed to defects in the insulin signaling pathway (Dresner et al., 1999). Because we previously reported that reductions in the expression of genes of the insulin signaling pathway normally occur during hibernation (Jansen et al., 2019), we predicted that glucose feeding would reverse these changes. For example, we previously found that expression of the extracellular matrix protein MMP-2, a matrix metalloproteinase was

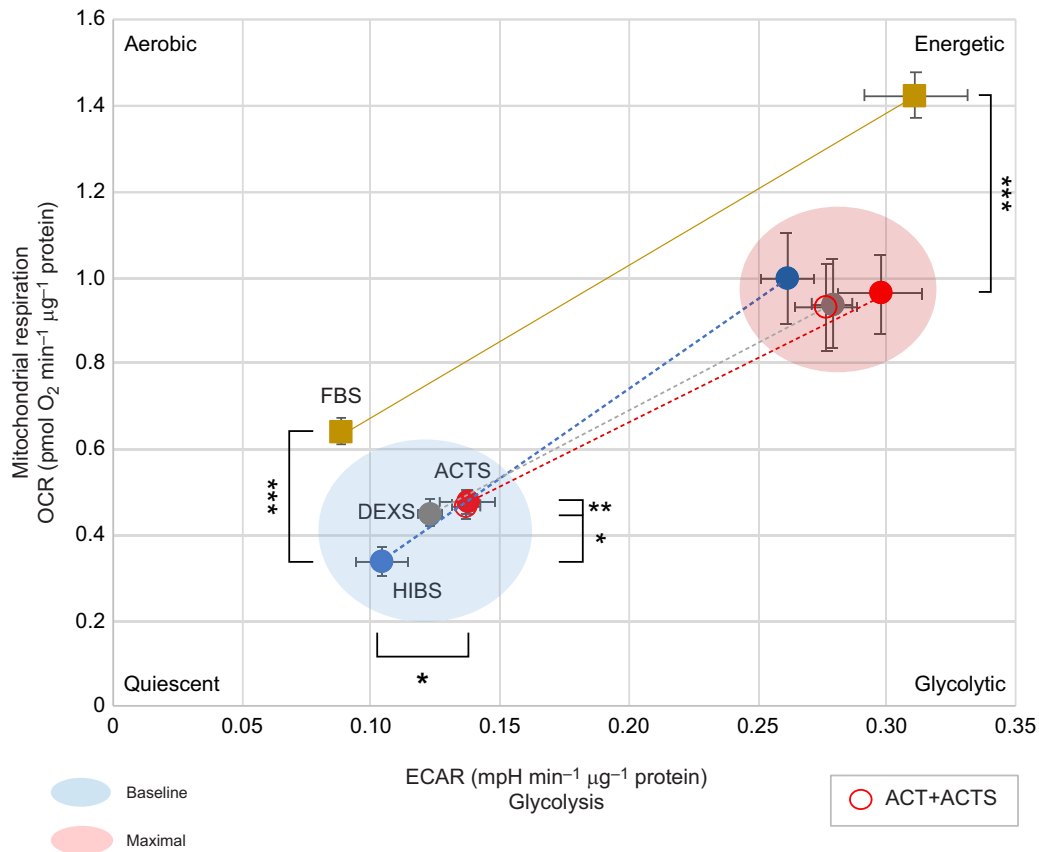

**Fig. 8. Cell phenotype of bear adipocytes obtained from hibernating bears and cultured in the presence of different serum combinations.** HIBS, hibernation serum (prior to feeding); DEXS, serum from fed bears; ACTS, serum from active season bears (June–July); FBS, fetal bovine serum. Active season cells cultured with active season serum are shown for comparison but were not included in the analysis. One-way ANOVA; \* $P \leq 0.05$ ; \*\* $P \leq 0.01$ , \*\*\* $P \leq 0.001$ . Results are representative of three separate experiments,  $n=7$  for each serum treatment. OCR, oxygen consumption rate; ECAR, extracellular acidification rate.

increased in adipose tissue (Jansen et al., 2019). MMP-2 has been linked to elevated FFAs and insulin resistance via its ability to cleave the extracellular domain of the insulin receptor (Delano and Schmid-Schönbein, 2008). Additionally, several integrin-related proteins are known to interact with the insulin receptor, such as integrin-linked kinase (ILK) (Williams et al., 2015). We recently found that *ILK* expression was significantly reduced in adipose of hibernating bears (Jansen et al., 2019). Other metabolic pathways involving ketones acting alone or together with fatty acids have also been proposed to confer insulin resistance via disruption of fatty acid oxidation in the mitochondria (Schooneman et al., 2013). Key intermediates in this cascade are the acylcarnitines which are elevated in hibernating bears (Welinder et al., 2016). Acylcarnitines act in the mitochondria via the enzyme carnitine acetyl-CoA transferase (CrAT) (Muio et al., 2012). *CrAT* gene expression was significantly lower in hibernating bear adipose (Jansen et al., 2019) and in diabetic humans (Muio et al., 2012). It remains to be determined if changes in the expression of these genes occurs after feeding bears.

Results from our *in vitro* studies confirmed that adipocytes from fed bears exhibited an enhanced response to insulin. This could not be explained by differences in serum concentrations of glucose or insulin concentrations as these were not different at baseline before or after feeding (Fig. 2). Along the same lines, the failure of hibernating cells to respond to insulin could not be explained by differences in serum insulin concentrations. However, it is possible that longer exposure to glucose could impact the concentrations of

insulin and glucose and thereby sensitize the cells to insulin. A more likely explanation is that other serum factors are important for determining insulin sensitivity, metabolism and energetics. In addition to the effects of different sera we also found evidence for cell autonomous effects. For example, glucose uptake was much greater in hibernating cells cultured with active season serum compared to fed cells cultured in fed serum (Fig. 3). This is similar to our previous observations where hibernation cells cultured with active season serum responded more to insulin than active season cells cultured in matching serum (Rigano et al., 2017). It will be important to fully characterize the gene expression changes in cultured adipocytes under similar and contrasting serum conditions to identify the players involved.

It is well established that hibernation is characterized by reductions in activity levels and longer torpor bouts in response to the absence of food. Furthermore, the number and duration of torpor bouts can be influenced by diet (Dark, 2005; Frank et al., 2008; Vuarin and Henry, 2014). These effects during hibernation have usually been studied in food-storing hibernators. In several studies higher amounts of polyunsaturated fatty acids (PUFAs) in food caches resulted in the shortening of hibernation duration (Munro et al., 2005; Siutz et al., 2017) and supports the hypothesis that increased energy intake shortens hibernation duration. Other studies in bears found no effect of PUFA diet before hibernation (Rivet et al., 2017) or were inconclusive in lemurs (Faherty et al., 2017). To our knowledge, a pure carbohydrate has not been administered in



hibernation to determine if it can reverse the hibernation state. We found that dextrose feeding caused dramatic and prolonged increases in general activity levels, despite being induced by less than 2 weeks of feeding glucose at a level necessary to offset the lowest predicted cost of hibernation. Along with this, we saw a prolonged ~30% increase in heart rate after feeding. As heart rate is a proxy for metabolic rate, the increase is indicative of increased energy expenditure after feeding. However, we did not see an accompanying significant increase in body temperature. Although feeding resulted in a nearly significant increase of approximately 1–1.5°C ( $P=0.0569$ ), it is possible that the number of animals was insufficient and future studies should include more animals.

A controversial aspect of hibernation physiology, namely the role and importance of circadian rhythms, has received relatively little attention in bears (Harlow et al., 2004; Jansen et al., 2016; Körtner and Geiser, 2000; Ruby, 2003; Toien et al., 2015; Ware et al., 2012; Williams et al., 2011). Since bears hibernate at elevated body temperature, questions regarding the integrity and function of circadian rhythms are relevant to our understanding of hibernation. The most striking aspect of the circadian rhythm in hibernating bears is not that it is absent, but that it persists, although at very low amplitude (Jansen et al., 2016). Given the reduction in metabolic rate (up to 75%) during hibernation in bears (Toien et al., 2011; Watts and Cuyler, 1988; Watts and Jonkel, 1988), it is likely that the reduction in circadian amplitude we observed for heart rate prior to feeding is a reflection of decreased energetic demand, nutrient status, or both (Jansen et al., 2016; Ware et al., 2012), although environmental influences cannot be ruled out (Evans et al., 2016). Intriguingly, a role for nutrient status in the operation of the circadian clock has been proposed for numerous species ranging from yeast to mice to maintain the temporal separation of incompatible cellular process (Wang et al., 2015). Thus, the increase in rhythm strength during feeding supports the hypothesis that circadian clocks are directly responsive to nutrient availability. Our cultured adipocyte model system could lead to new approaches for studying links between circadian rhythms and energetics.

The effects of dextrose on most parameters were virtually identical regardless of the level of energy replacement. This suggests that there is a ceiling (i.e. 53% of LOMR) beyond which no further increases are possible, and that full restoration requires additional metabolic processes. Feeding lower amounts of glucose and/or feeding for longer periods would be needed to confirm this. Alternatively, other dietary constituents, such as protein or essential fatty acids may be required for full restoration to occur. This seems somewhat unlikely however, as circulating glycerol and  $\beta$ -hydroxybutyrate concentrations were suppressed to summer active levels with only 53% dextrose (Table 1) (Graesli et al., 2015; Rigano et al., 2017). Thus, the most parsimonious explanation for our findings is that fatty acid oxidation was inhibited to a maximum of ~50% allowing the ingested dextrose (glucose) to become an alternate metabolic fuel, while the remaining ~50% of fatty acid metabolism was maintained to suppress insulin sensitivity, hence glucose utilization. Altogether, these results reveal a high degree of metabolic flexibility and coordination of physiological processes occurring in hibernating bears.

Metabolic flux analyses revealed a greater than 40% reduction in oxygen consumption and depression of glycolysis rates in hibernation cells compared to active season cells under season-matching serum conditions. The metabolic depression occurred at 37°C and thus provides external validation of the proposed independence between temperature and metabolic depression in bears (Toien et al., 2011). Additionally, the greater distance between

basal and maximal levels of mitochondrial respiration expressed by hibernation cells cultured in hibernation serum reveals that hibernation cells have a greater metabolic potential than active season cells or cells from fed bears. This would be predicted if fatty acid oxidation is the primary fuel source as fatty acid oxidation yields more ATP. Dextrose feeding diminished this potential and supports the metabolic switch in fuel use. In summary, it will be possible now to model certain aspects of hibernation ‘*in vitro*’ for more detailed dissection of the cellular and molecular pathways involved.

### Limitations and prospects

The number of animals used to monitor heart rate was too low to enable statistical analysis. Thus, future studies should include more unfed bears. We also were not able to perform comparisons of glucose uptake and metabolic flux analysis for both levels of glucose feeding. However, given the similarity in the results for all other measures we predict those outcomes would be similar. The potential that the ‘ceiling’ effect proposed was due to factors unrelated to glucose, such as gut distention, seems unlikely for two reasons. First, even unfed bears in our facility drink water (unpublished observations), thus gut distention is a normal, albeit small, part of hibernation in captive bears given *ad libitum* access to water. Second, we observed increases in metabolic rate *in vitro* in cells from fed bears. Although we did not have both feeding groups to evaluate, this suggests changes are independent of the gut.

We have demonstrated that several features of the physiology of bear hibernation can be reversed with dextrose feeding. This was supported by increases in metabolic rate, circadian rhythm strength and the partial restoration of insulin sensitivity. Where applicable, *in vitro* studies mirrored these findings. Taken together, this ability to study the processes controlling bear hibernation both *in vivo* and in highly controlled cell cultures provides a new model system to understand hibernation.

### Acknowledgements

We are grateful to Tim Laske at Medtronic (Minneapolis, MN) for the gift of Reveal LINQ monitors used in the current study, to the many volunteers working at the WSU Bear Center and to Jessie McCleary, Nina Woodford and Gaylynn Clyde of the WSU Office of the Campus Veterinarian.

### Competing interests

The authors declare that the research was conducted in the absence of any commercial or financial relationships that could be construed as a potential conflict of interest.

### Author contributions

Conceptualization: H.T.J., C.T.R.; Methodology: H.T.J., B.E.H., C.T.R.; Validation: H.T.J., B.E.H.; Formal analysis: H.T.J., B.E.H., A.M.C.; Investigation: H.T.J., A.M.C., J.L.K., M.W.S., C.T.R.; Resources: H.T.J., A.M.C., C.T.R.; Data curation: H.R.H., M.L.M.; Writing - original draft: H.T.J., J.L.K., M.W.S., C.T.R.; Writing - review & editing: H.T.J., B.E.H., H.R.H., A.M.C., J.L.K., M.W.S., C.T.R.; Visualization: H.T.J., B.E.H.; Supervision: H.T.J., C.T.R.; Project administration: H.T.J., C.T.R.; Funding acquisition: H.T.J., J.L.K., C.T.R.

### Funding

Funding was obtained from the International Association for Bear Research and Management (WSU003675) and the following Washington State University endowments: Raiii Korkka Brown Bear Fund, Bear Research and Conservation Fund and Nutritional Ecology Fund.

### References

- Boden, G. (2008). Obesity and free fatty acids. *Endocrinol. Metab. Clin. North Am.* **37**, 635–646. doi:10.1016/j.ecl.2008.06.007
- Cahill, G. F., Jr, Herrera, M. G., Morgan, A. P., Soeldner, J. S., Steinke, J., Levy, P. L., Reichard, G. A., Jr. and Kipnis, D. M. (1966). Hormone-fuel interrelationships during fasting. *J. Clin. Invest.* **45**, 1751–1769. doi:10.1172/JCI105481

- Cahill, G., Jr, Felig, P., Owen, O. and Wahren, J.** (1970). Metabolic adaptation to prolonged starvation in man. *Nord. Med.* **83**, 89.
- Carey, H. V., Andrews, M. T. and Martin, S. L.** (2003). Mammalian hibernation: cellular and molecular responses to depressed metabolism and low temperature. *Physiol. Rev.* **83**, 1153-1181. doi:10.1152/physrev.00008.2003
- Dark, J.** (2005). Annual lipid cycles in hibernators: integration of physiology and behavior. *Annu. Rev. Nutr.* **25**, 469-497. doi:10.1146/annurev.nutr.25.050304.092514
- Delano, F. A. and Schmid-Schönbein, G. W.** (2008). Proteinase activity and receptor cleavage. *Hypertension* **52**, 415-423. doi:10.1161/HYPERTENSIONAHA.107.104356
- Dresner, A., Laurent, D., Marcucci, M., Griffin, M. E., Dufour, S., Cline, G. W., Slezak, L. A., Andersen, D. K., Hundal, R. S., Rothman, D. L. et al.** (1999). Effects of free fatty acids on glucose transport and IRS-1-associated phosphatidylinositol 3-kinase activity. *J. Clin. Invest.* **103**, 253-259. doi:10.1172/JCI5001
- Evans, A. L., Singh, N. J., Friebe, A., Arnemo, J. M., Laske, T. G., Fröbert, O., Swenson, J. E. Blanc, S.** (2016). Drivers of hibernation in the brown bear. *Front. Zool.* **13**, 1-13. doi:10.1186/s12983-016-0140-6
- Faherty, S. L., Campbell, C. R., Hilbig, S. A. and Yoder, A. D.** (2017). The effect of body mass and diet composition on torpor patterns in a Malagasy primate (*Microcebus murinus*). *J. Comp. Physiol. B* **187**, 677-688. doi:10.1007/s00360-016-1045-6
- Florant, G. L. and Healy, J. E.** (2012). The regulation of food intake in mammalian hibernators: a review. *J. Comp. Physiol. B* **182**, 451-467. doi:10.1007/s00360-011-0630-y
- Frank, C. L., Karpovich, S. and Barnes, B. M.** (2008). Dietary fatty acid composition and the hibernation patterns in free-ranging arctic ground squirrels. *Physiol. Biochem. Zool.* **81**, 486-495. doi:10.1086/589107
- Gehring, J. L., Rigano, K. S., Evans Hutzenbiler, B. D., Nelson, O. L., Robbins, C. T. and Jansen, H. T.** (2016). A protocol for the isolation and cultivation of brown bear (*Ursus arctos*) adipocytes. *Cytotechnology* **68**, 2177-2191. doi:10.1007/s10616-015-9937-y
- Geiser, F.** (1998). Evolution of daily torpor and hibernation in birds and mammals: importance of body size. *Clin. Exp. Pharmacol. Physiol.* **25**, 736-739. doi:10.1111/j.1440-1681.1998.tb02287.x
- Geiser, F.** (2004). Metabolic rate and body temperature reduction during hibernation and daily torpor. *Annu. Rev. Physiol.* **66**, 239-274. doi:10.1146/annurev.physiol.66.032102.115105
- Geiser, F.** (2013). Hibernation. *Curr. Biol.* **23**, R188-R193. doi:10.1016/j.cub.2013.01.062
- Graesli, A. R., Evans, A. L., Fahman, A., Bertelsen, M. F., Blanc, S. and Arnemo, J. M.** (2015). Seasonal variation in haematological and biochemical variables in free-ranging subadult brown bears (*Ursus arctos*) in Sweden. *BMC Vet. Res.* **11**, 301. doi:10.1186/s12917-015-0615-2
- Harlow, H. J. and Frank, C. L.** (2001). The role of dietary fatty acids in the evolution of spontaneous and facultative hibernation patterns in prairie dogs. *J. Comp. Physiol. B* **171**, 77-84. doi:10.1007/s003600000148
- Harlow, H. J., Lohuis, T., Grogan, R. G. and Beck, T. D. I.** (2002). Body mass and lipid changes by hibernating reproductive and nonreproductive black bears (*Ursus americanus*). *J. Mammal.* **83**, 1020-1025. doi:10.1644/1545-1542(2002)083<1020:BMALCB>2.0.CO;2
- Harlow, H., Lohuis, T., Anderson-Sprecher, R. and Beck, T.** (2004). Body surface temperature of hibernating black bears may be related to periodic muscle activity. *J. Mammal.* **85**, 414-419. doi:10.1644/1545-1542(2004)085<0414:BSTOHB>2.0.CO;2
- Hellgren, E. C.** (1998). Physiology of hibernation in bears. *Ursus* **10**, 467-477.
- Jansen, H. T., Leise, T., Stenhouse, G., Pigeon, K., Kasworm, W., Teisberg, J., Radandt, T., Dallmann, R., Brown, S. and Robbins, C. T.** (2016). The bear circadian clock doesn't 'sleep' during winter dormancy. *Front. Zool.* **13**, 42. doi:10.1186/s12983-016-0173-x
- Jansen, H. T., Trojahn, S., Saxton, M. W., Quackenbush, C. R., Evans Hutzenbiler, B. D., Nelson, O. L., Cornejo, O. E., Robbins, C. T. and Kelley, J. L.** (2019). Hibernation induces widespread transcriptional remodeling in metabolic tissues of the grizzly bear. *Commun. Biol.* **2**, 336. doi:10.1038/s42003-019-0574-4
- Joyce-Zuniga, N. M., Newberry, R. C., Robbins, C. T., Ware, J. V., Jansen, H. T. and Nelson, O. L.** (2016). Positive reinforcement training for blood collection in grizzly bears (*Ursus arctos horribilis*) results in undetectable elevations in serum cortisol levels: a preliminary investigation. *J. Appl. Anim. Welf. Sci.* **19**, 210-215. doi:10.1080/10888705.2015.1126523
- Kamine, A., Shimozuru, M., Shibata, H. and Tsubota, T.** (2012a). Changes in blood glucose and insulin responses to intravenous glucose tolerance tests and blood biochemical values in adult female Japanese black bears (*Ursus thibetanus japonicus*). *Jpn. J. Vet. Res.* **60**, 5-13.
- Kamine, A., Shimozuru, M., Shibata, H. and Tsubota, T.** (2012b). Effects of intramuscular administration of tiletamine-zolazepam with and without sedative pretreatment on plasma and serum biochemical values and glucose tolerance test results in Japanese black bears (*Ursus thibetanus japonicus*). *Am. J. Vet. Res.* **73**, 1282-1289. doi:10.2460/ajvr.73.8.1282
- Körtner, G. and Geiser, F.** (2000). The temporal organization of daily torpor and hibernation: circadian and circannual rhythms. *Chronobiol. Int.* **17**, 103-128. doi:10.1081/CBI-100101036
- Lane, J. E., Kruuk, L. E., Charmantier, A., Murie, J. O. and Dobson, F. S.** (2012). Delayed phenology and reduced fitness associated with climate change in a wild hibernator. *Nature* **489**, 554-557. doi:10.1038/nature11335
- Laske, T. G., Iazzo, P. A. and Garshelis, D. L.** (2017). Six years in the life of a mother bear - the longest continuous heart rate recordings from a free-ranging mammal. *Sci. Rep.* **7**, 40732. doi:10.1038/srep40732
- Lin, D. C., Hershey, J. D., Mattoon, J. S. and Robbins, C. T.** (2012). Skeletal muscles of hibernating brown bears are unusually resistant to effects of denervation. *J. Exp. Biol.* **215**, 2081-2087. doi:10.1242/jeb.066134
- Lohuis, T. D., Beck, T. D. I. and Harlow, H. J.** (2005). Hibernating black bears have blood chemistry and plasma amino acid profiles that are indicative of long-term adaptive fasting. *Can. J. Zool.* **83**, 1257-1263. doi:10.1139/z05-120
- McCain, S., Ramsay, E. and Kirk, C.** (2013). The effects of hibernation and captivity on glucose metabolism and thyroid hormones in American black bear (*Ursus americanus*). *J. Zoo Wildl. Med.* **44**, 324-332. doi:10.1638/2012-0146R1.1
- Mohr, S. M., Bagriantsev, S. N. and Gracheva, E. O.** (2020). Cellular, molecular, and physiological adaptations of hibernation: the solution to environmental challenges. *Annu. Rev. Cell Dev. Biol.* **36**, 315-338. doi:10.1146/annurev-cellbio-012820-095945
- Munro, D., Thomas, D. W. and Humphries, M. M.** (2005). Torpor patterns of hibernating eastern chipmunks *Tamias striatus* vary in response to the size and fatty acid composition of food hoards. *J. Anim. Ecol.* **74**, 692-700. doi:10.1111/j.1365-2656.2005.00968.x
- Muoio, D. M., Noland, R. C., Kovalik, J. P., Seiler, S. E., Davies, M. N., DeBalsi, K. L., Ilkayeva, O. R., Stevens, R. D., Kheterpal, I., Zhang, J. et al.** (2012). Muscle-specific deletion of carnitine acetyltransferase compromises glucose tolerance and metabolic flexibility. *Cell Metab.* **15**, 764-777. doi:10.1016/j.cmet.2012.04.005
- Nelson, O. L. and Robbins, C. T.** (2010). Cardiac function adaptations in hibernating grizzly bears (*Ursus arctos horribilis*). *J. Comp. Physiol. B Biochem. Syst. Environ. Physiol.* **180**, 465-473. doi:10.1007/s00360-009-0421-x
- Nelson, R. A., Folk, G. E., Pfeiffer, E. W., Craighead, J. J., Jonkel, C. J. and Steiger, D. L.** (1983). Behavior, biochemistry, and hibernation in black, grizzly and polar bears. In *Int. Conf. Bear Res. and Manage.*, Vol. 5, pp. 284-290. Madison, WI: International Association for Bear Research and Management.
- Nelson, O. L., Robbins, C. T. and Bentjen, S.** (2010). Upregulation of beta 1, beta 2 and beta 3 adrenergic receptor expression in the hibernating bear myocardium: A role for cardioprotection? *FASEB J.* **24**, 1036.6
- Olmstead, K. I., La Frano, M. R., Fahrman, J., Grapov, D., Viscarra, J. A., Newman, J. W., Fiehn, O., Crocker, D. E., Filipp, F. V. and Ortiz, R. M.** (2017). Insulin induces a shift in lipid and primary carbon metabolites in a model of fasting-induced insulin resistance. *Metabolomics* **13**, 60. doi:10.1007/s11306-017-1186-y
- Palumbo, P. J., Wellik, D. L., Bagley, N. A. and Nelson, R. A.** (1983). Insulin and glucagon responses in the hibernating black bear. *Bears* **5**, 291-296. doi:10.2307/3872552
- Pike Winer, L. S. and Wu, M.** (2014). Rapid analysis of glycolytic and oxidative substrate flux of cancer cells in a microplate. *PLoS ONE* **9**, e109916. doi:10.1371/journal.pone.0109916
- Rigano, K. S., Gehring, J. L., Hutzenbiler, B. D. E., Chen, A. V., Nelson, O. L., Vella, C. A., Robbins, C. T. and Jansen, H. T.** (2017). Life in the fat lane: seasonal regulation of insulin sensitivity, food intake, and adipose biology in brown bears. *J. Comp. Physiol. B Biochem. Syst. Environ. Physiol.* **187**, 649-676. doi:10.1007/s00360-016-1050-9
- Rivet, D. R., Nelson, O. L., Vella, C. A., Jansen, H. T. and Robbins, C. T.** (2017). Systemic effects of a high saturated fat diet in grizzly bears (*Ursus arctos horribilis*). *Can. J. Zool. Revue Canadienne De Zoologie* **95**, 797-807. doi:10.1139/cjz-2016-0271
- Robbins, C. T., Lopez-Alfaro, C., Rode, K. D., Toien, O. and Nelson, O. L.** (2012). Hibernation and seasonal fasting in bears: the energetic costs and consequences for polar bears. *J. Mammal.* **93**, 1493-1503. doi:10.1644/11-MAMM-A-406.1
- Ruby, N. F.** (2003). Hibernation: when good clocks go cold. *J. Biol. Rhythms* **18**, 275-286. doi:10.1177/0748730403254971
- Schooneman, M. G., Vaz, F. M., Houten, S. M. and Soeters, M. R.** (2013). Acylcarnitines: reflecting or inflicting insulin resistance? *Diabetes* **62**, 1-8. doi:10.2337/db12-0466
- Sikes, R. S., Gannon, W. L. and Mammalogists, A. S.** (2011). Guidelines of the american society of mammalogists for the use of wild mammals in research. *J. Mammal.* **92**, 235-253. doi:10.1644/10-MAMM-F-355.1
- Siutz, C., Nemeth, M., Wagner, K. H., Quint, R., Ruf, T. and Millesi, E.** (2017). Effects of food store quality on hibernation performance in common hamsters. *PLoS ONE* **12**, e0185913. doi:10.1371/journal.pone.0185913
- Storey, K. B. and Storey, J. M.** (1990). Metabolic rate depression and biochemical adaptation in anaerobiosis, hibernation and estivation. *Q. Rev. Biol.* **65**, 145-174. doi:10.1086/416717

- Toien, O., Blake, J., Edgar, D. M., Grahn, D. A., Heller, H. C. and Barnes, B. M.** (2011). Hibernation in black bears: independence of metabolic suppression from body temperature. *Science* **331**, 906-909. doi:10.1126/science.1199435
- Toien, O., Blake, J. and Barnes, B. M.** (2015). Thermoregulation and energetics in hibernating black bears: metabolic rate and the mystery of multi-day body temperature cycles. *J. Comp. Physiol. B* **185**, 447-461. doi:10.1007/s00360-015-0891-y
- Tokuyama, K., Galantino, H. L., Green, R. and Florant, G. L.** (1991). Seasonal glucose uptake in marmots (*Marmota flaviventris*): the role of pancreatic hormones. *Comp. Biochem. Physiol. A Comp. Physiol.* **100**, 925-930. doi:10.1016/0300-9629(91)90316-5
- Turner, R. C., Holman, R. R., Matthews, D., Hockaday, T. D. and Peto, J.** (1979). Insulin deficiency and insulin resistance interaction in diabetes: estimation of their relative contribution by feedback analysis from basal plasma insulin and glucose concentrations. *Metabolism* **28**, 1086-1096. doi:10.1016/0026-0495(79)90146-X
- Vuarin, P. and Henry, P. Y.** (2014). Field evidence for a proximate role of food shortage in the regulation of hibernation and daily torpor: a review. *J. Comp. Physiol. B* **184**, 683-697. doi:10.1007/s00360-014-0833-0
- Wang, G. Z., Hickey, S. L., Shi, L., Huang, H. C., Nakashe, P., Koike, N., Tu, B. P., Takahashi, J. S. and Konopka, G.** (2015). Cycling transcriptional networks optimize energy utilization on a genome scale. *Cell Rep.* **13**, 1868-1880. doi:10.1016/j.celrep.2015.10.043
- Ware, J. V., Nelson, O. L., Robbins, C. T. and Jansen, H. T.** (2012). Temporal organization of activity in the brown bear (*Ursus arctos*): roles of circadian rhythms, light, and food entrainment. *Am. J. Physiol. Regul. Integr. Comp. Physiol.* **303**, R890-R902. doi:10.1152/ajpregu.00313.2012
- Ware, J. V., Nelson, O. L., Robbins, C. T., Carter, P. A., Sarver, B. A. and Jansen, H. T.** (2013). Endocrine rhythms in the brown bear (*Ursus arctos*): Evidence supporting selection for decreased pineal gland size. *Physiol. Rep.* **1**, e00048. doi:10.1002/phy2.48
- Watts, P. and Cuyler, C.** (1988). Metabolism of the black bear under simulated denning conditions. *Acta Physiol. Scand.* **134**, 149-152. doi:10.1111/j.1748-1716.1988.tb08471.x
- Watts, P. D. and Jonkel, C.** (1988). Energetic cost of winter dormancy in grizzly bear. *J. Wildl. Manag.* **52**, 654-656. doi:10.2307/3800925
- Welinder, K. G., Hansen, R., Overgaard, M. T., Brohus, M., Sonderkaer, M., von Bergen, M., Rolle-Kampczyk, U., Otto, W., Lindahl, T. L., Arinell, K. et al.** (2016). Biochemical foundations of health and energy conservation in hibernating free-ranging subadult brown bear *Ursus arctos*. *J. Biol. Chem.* **291**, 22509-22523. doi:10.1074/jbc.M116.742916
- Williams, C. T., Barnes, B. M. and Buck, C. L.** (2011). Daily body temperature rhythms persist under the midnight sun but are absent during hibernation in free-living arctic ground squirrels. *Biol. Lett.* **8**, 31-34. doi:10.1098/rsbl.2011.0435
- Williams, A. S., Kang, L. and Wasserman, D. H.** (2015). The extracellular matrix and insulin resistance. *Trends Endocrinol. Metabol.* **26**, 357-366. doi:10.1016/j.tem.2015.05.006
